# Supplementary material for: Exogenous melatonin promoted seed hypocotyl germination of Paeonia ostia ‘Fengdan’ characterized by regulating hormones and starches
Source: PeerJ. 2024 Sep 20;12:e18038. doi: 10.7717/peerj.18038 (PMC11418826; doi:10.7717/peerj.18038)
Supplement: File S1 [file peerj-12-18038-s001.xlsx]

## Sheet: Sheet1
Raw data (Fig. 1)
Treatment	Rooting rate(100%, 3 replicates)			Radicle diameter(mm, 3 replicates)
CK	0.42	0.38	0.46	1.112	1.376	1.326
MEL50	0.44	0.38	0.42	1.362	1.468	1.482
MEL100	0.6	0.62	0.56	1.62	1.638	1.616
MEL200	0.5	0.56	0.52	1.632	1.528	1.606
MEL400	0.34	0.38	0.36	1.4	1.47	1.332
