# Supplementary material for: Exogenous melatonin promoted seed hypocotyl germination of Paeonia ostia ‘Fengdan’ characterized by regulating hormones and starches
Source: PeerJ. 2024 Sep 20;12:e18038. doi: 10.7717/peerj.18038 (PMC11418826; doi:10.7717/peerj.18038)
Supplement: File S2 [file peerj-12-18038-s002.xlsx]

## Sheet: Sheet1
Raw data (Fig. 2)
Treatment	Starch(mg/g, 3 replicates)			α-Diastase(U/g, 3 replicates)			β-Diastase(U/g, 3 replicates)
CK	121.524	120.287	119.614	4.083	3.863	3.932	6.593	6.7	6.772
MEL50	119.948	123.016	120.417	4.705	4.809	4.719	8.873	8.817	8.995
MEL100	89.657	90.366	88.359	7.054	7.069	6.867	9.29	9.008	9.041
MEL200	84.313	86.022	89.09	8.008	8.02	8.062	12.609	12.842	12.832
MEL400	115.251	116.92	117.599	5.483	5.263	5.532	22.027	22.906	22.662
