# Supplementary material for: Exogenous melatonin promoted seed hypocotyl germination of Paeonia ostia ‘Fengdan’ characterized by regulating hormones and starches
Source: PeerJ. 2024 Sep 20;12:e18038. doi: 10.7717/peerj.18038 (PMC11418826; doi:10.7717/peerj.18038)
Supplement: File S3 [file peerj-12-18038-s003.xlsx]

## Sheet: Sheet1
Raw data (Fig. 3)
Treatment	Free fatty acid(µmol/g, 3 replicates)			Lipase(U/g, 3 replicates)			Sucrose(mg/g, 3 replicates)
CK	0.16	0.162	0.159	6.45	6.464	6.517	31.728	31.373	31.863
MEL50	0.328	0.327	0.335	6.938	6.81	6.76	31.783	30.938	31.656
MEL100	0.352	0.378	0.359	4.485	4.434	4.364	40.242	38.918	39.286
MEL200	0.64	0.641	0.642	2.811	2.819	2.883	45.067	44.286	45.155
MEL400	0.413	0.41	0.411	3.242	3.185	3.282	41.431	41.63	41.73
