# Supplementary material for: Exogenous melatonin promoted seed hypocotyl germination of Paeonia ostia ‘Fengdan’ characterized by regulating hormones and starches
Source: PeerJ. 2024 Sep 20;12:e18038. doi: 10.7717/peerj.18038 (PMC11418826; doi:10.7717/peerj.18038)
Supplement: File S4 [file peerj-12-18038-s004.xlsx]

## Sheet: Sheet1
Raw data (Fig. 4)
Treatment	GA1(ng/g, 3 replicates)			GA3(ng/g, 3 replicates)			GA4(ng/g, 3 replicates)			GA7(ng/g, 3 replicates)			ABA(ng/g, 3 replicates)			GA3/ABA(3 replicates)
CK	2.754	2.139	2.189	1.051	0.989	0.972	2.059	2.447	1.95	0	0	0	0.513	0.434	0.438	2.04696	2.27647	2.21965
MEL50	3.211	3.131	3.344	0.84	0.935	0.946	5.236	5.02	4.687	0.058	0.058	0.052	0.409	0.488	0.446	2.05559	1.91623	2.11852
MEL100	3.547	3.757	3.96	1.646	1.537	1.522	4.506	4.727	4.341	0.07	0.076	0.066	0.363	0.382	0.305	4.53085	4.01836	4.98108
MEL200	3.828	3.795	3.882	1.37	1.346	1.244	3.564	3.872	3.609	0.1	0.092	0.095	0.431	0.409	0.418	3.17684	3.28887	2.97356
MEL400	3.216	3.777	3.276	0.919	1.11	1.03	2.685	2.508	2.251	0.041	0.052	0.054	0.508	0.522	0.536	1.80958	2.12573	1.92263
