# Supplementary material for: Exogenous melatonin promoted seed hypocotyl germination of Paeonia ostia ‘Fengdan’ characterized by regulating hormones and starches
Source: PeerJ. 2024 Sep 20;12:e18038. doi: 10.7717/peerj.18038 (PMC11418826; doi:10.7717/peerj.18038)
Supplement: File S5 [file peerj-12-18038-s005.xlsx]

## Sheet: Sheet1
Correlation analysis data (Fig. 5)
	Rooting rate	Radicle diameter	GA1	GA3	GA4	GA7	ABA	GA3/ABA	Starch	α-Diastase	β-Diastase	Free fatty acid	Lipase	Sucrose
Rooting rate	1	0.822859	0.55668	0.934725	0.500337	0.566353	-0.957263	0.962385	-0.891599	0.781623	-0.432507	0.3515	-0.267646	0.374888
Radicle diameter	0.822859	1	0.924516	0.83025	0.661767	0.912752	-0.7344	0.81521	-0.895695	0.857284	0.0193838	0.714923	-0.552201	0.651303
GA1	0.55668	0.924516	1	0.646475	0.545519	0.960131	-0.423543	0.583634	-0.767858	0.791348	0.377861	0.844555	-0.724331	0.790115
GA3	0.934725	0.83025	0.646475	1	0.313594	0.572371	-0.826389	0.977017	-0.919287	0.825358	-0.133813	0.407059	-0.510047	0.582868
GA4	0.500337	0.661767	0.545519	0.313594	1	0.605567	-0.635719	0.443371	-0.334385	0.249944	-0.353917	0.256506	0.179289	-0.0664179
GA7	0.566353	0.912752	0.960131	0.572371	0.605567	1	-0.443839	0.516434	-0.776109	0.820376	0.239251	0.909382	-0.646627	0.733507
ABA	-0.957263	-0.7344	-0.423543	-0.826389	-0.635719	-0.443839	1	-0.914334	0.732401	-0.585246	0.614187	-0.14787	-0.00475817	-0.110645
GA3/ABA	0.962385	0.81521	0.583634	0.977017	0.443371	0.516434	-0.914334	1	-0.855012	0.726868	-0.28993	0.277809	-0.327164	0.412056
Starch	-0.891599	-0.895695	-0.767858	-0.919287	-0.334385	-0.776109	0.732401	-0.855012	1	-0.977127	0.0472608	-0.701027	0.655492	-0.743019
α-Diastase	0.781623	0.857284	0.791348	0.825358	0.249944	0.820376	-0.585246	0.726868	-0.977127	1	0.086662	0.82025	-0.757125	0.835194
β-Diastase	-0.432507	0.0193838	0.377861	-0.133813	-0.353917	0.239251	0.614187	-0.28993	0.0472608	0.086662	1	0.436476	-0.699066	0.614421
Free fatty acid	0.3515	0.714923	0.844555	0.407059	0.256506	0.909382	-0.14787	0.277809	-0.701027	0.82025	0.436476	1	-0.808141	0.861848
Lipase	-0.267646	-0.552201	-0.724331	-0.510047	0.179289	-0.646627	-0.00475817	-0.327164	0.655492	-0.757125	-0.699066	-0.808141	1	-0.990279
Sucrose	0.374888	0.651303	0.790115	0.582868	-0.0664179	0.733507	-0.110645	0.412056	-0.743019	0.835194	0.614421	0.861848	-0.990279	1
